# Supplementary material for: The low-temperature (400 °C) coating of few-layer graphene on porous Li4Ti5O12via C28H16Br2 pyrolysis for lithium-ion batteries
Source: Royal Society of Chemistry journal article supplement (doi:10.1039/c2ra01263d), 2012-01-01
Supplement: c2ra01263d.pdf [file c2ra01263d.pdf]

Supplementary Information for

## Low-temperature (400 °C) coating few-layer graphene on porous $\text{Li}_4\text{Ti}_5\text{O}_{12}$ via $\text{C}_{28}\text{H}_{16}\text{Br}_2$ pyrolysis for lithium-ion batteries

Zelang Jian,<sup>a,b</sup> Liang Zhao,<sup>b</sup> Rui Wang,<sup>b</sup> Yong-Sheng Hu,<sup>\*b</sup> Hong Li,<sup>b</sup> Wen Chen,<sup>\*a</sup> Liquan Chen<sup>b</sup>

### Experimental section

The as-prepared  $\text{Li}_4\text{Ti}_5\text{O}_{12}$  was added to the  $\text{C}_{28}\text{H}_{16}\text{Br}_2$  (at a  $\text{Li}_4\text{Ti}_5\text{O}_{12}$ :  $\text{C}_{28}\text{H}_{16}\text{Br}_2$  ratio of 90: 10) tetrahydrofuran solution, and the slurries were stirred vigorously. After the evaporation of the tetrahydrofuran, the mixture of  $\text{Li}_4\text{Ti}_5\text{O}_{12}$  and  $\text{C}_{28}\text{H}_{16}\text{Br}_2$  was heat-treated at 200 °C for 30 min and then calcined at 400 °C for several hours in an argon atmosphere. The obtained sample was designated as  $\text{Li}_4\text{Ti}_5\text{O}_{12}$ /graphene.

The structures of the materials were characterized using an X'Pert Pro MPD X-ray diffractometer (Philips, Netherlands) with Cu K $\alpha$  radiation (1.5405 Å). The morphologies of the materials were observed using a scanning electron microscope (Hitachi S-4800). HRTEM was performed using an F20 HRTEM equipped with an energy dispersive X-ray analyzer (Horiba EMAX). The Raman spectra were obtained on a Renishaw inVia micro-Raman spectroscopy system. The TG/DTA curve of the  $\text{Li}_4\text{Ti}_5\text{O}_{12}$ /graphene sample was obtained using a Diamond TG/DTA thermoanalyzer.

The electrodes were prepared with active materials, carbon black, and poly(vinyl difluoride) at a weight ratio of 80:10:10. The slurry was cast on pure Al foil and dried at 100 °C in vacuum for 10 h. The coin cells CR2032 were assembled with pure lithium foil as counter electrode, a glass fiber as separator, and 1 M  $\text{LiPF}_6$  EC: DMC (1:1) as electrolyte in an argon filled glove box. The discharge and charge measurements were performed on a Land BT2000 battery test system (Wuhan, P. R. China). The mass loading of the electrodes is around 3.1 mg cm<sup>-2</sup>. The Li storage tests for the as-prepared  $\text{Li}_4\text{Ti}_5\text{O}_{12}$  and  $\text{Li}_4\text{Ti}_5\text{O}_{12}$ /graphene samples were performed at a voltage range of 1.0–2.2 V. For the AC impedance measurement, the amplitude of the AC signal was 5 mV and the frequencies were swept from 1 MHz to 10 mHz using the electrochemical workstation Zennrum.

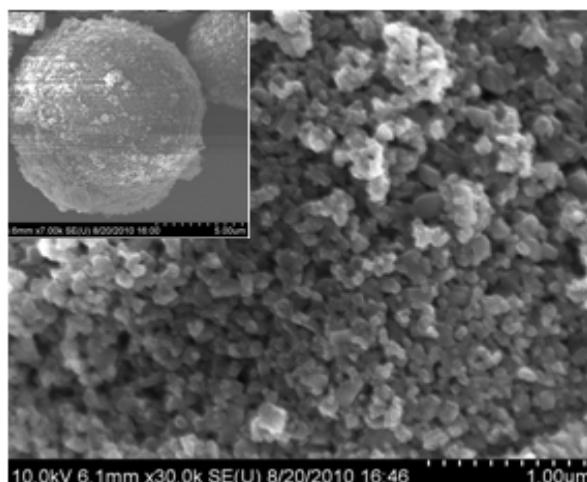

Figure S1 SEM images of the as-prepared  $\text{Li}_4\text{Ti}_5\text{O}_{12}$  sample.

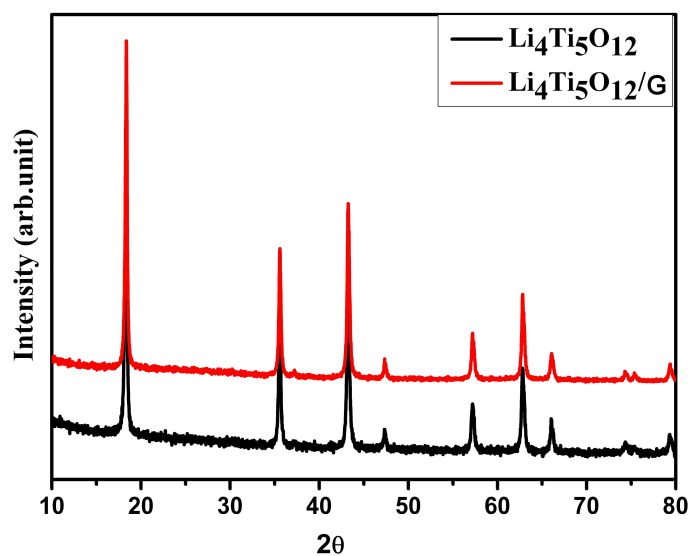

Figure S2 XRD patterns of the as-prepared  $\text{Li}_4\text{Ti}_5\text{O}_{12}$  and  $\text{Li}_4\text{Ti}_5\text{O}_{12}/\text{graphene}$  samples.

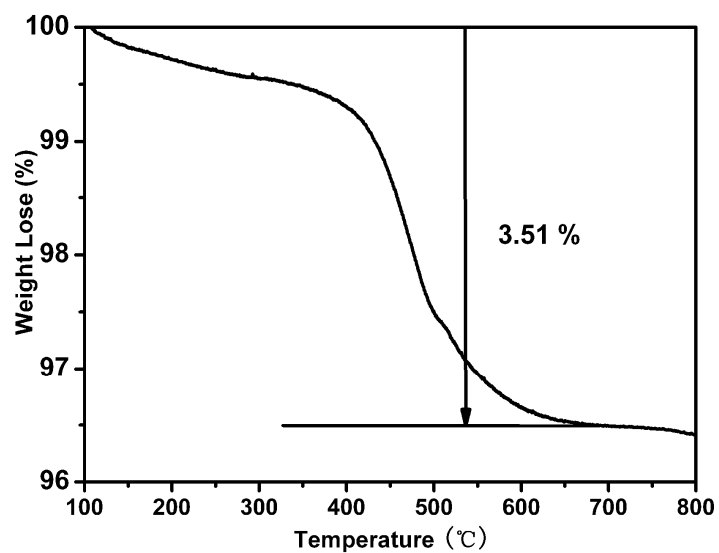

Figure S3 TG curve of the  $\text{Li}_4\text{Ti}_5\text{O}_{12}/\text{graphene}$  sample with carbon content of 3.51 wt.%.

5

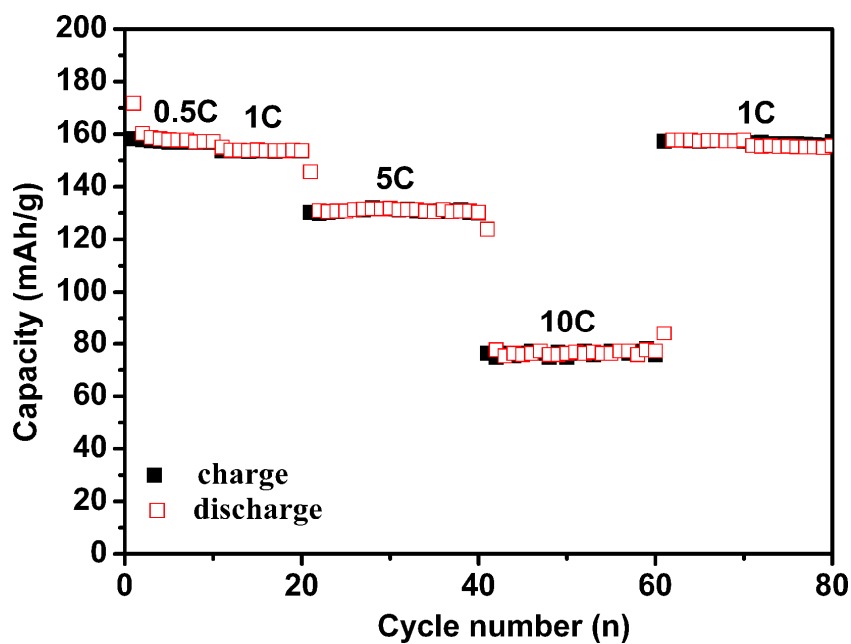

Figure S4 Discharge and charge capacities of the  $\text{Li}_4\text{Ti}_5\text{O}_{12}$ /graphene sample with carbon content of 3.51 wt.% at different current rates.

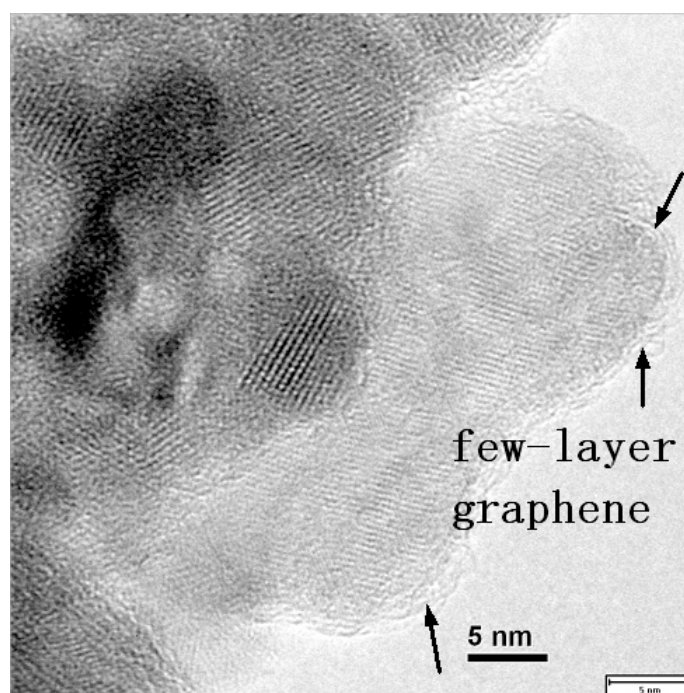

Figure S5 HRTEM image of the  $\text{Li}_2\text{MnO}_3$ /graphene sample.

5
